# Supplementary material for: Molecular Alteration Analysis of Human Gut Microbial Composition in Graves' disease Patients
Source: PubMed Central journal article supplement — Int J Biol Sci. 2018 Sep 7;14(11):1558–70. doi: 10.7150/ijbs.24151 (PMC6158725; doi:10.7150/ijbs.24151), 2018-09-07
Supplement: ijbsv14p1558s1.pdf [file ijbsv14p1558s1.pdf]

## Supporting Information

### Molecular Alteration Analysis of Human Gut Microbial Composition in Graves' disease Patients

Hafiz Muhammad Ishaq<sup>1,7</sup>, Imran Shair Mohammad<sup>2</sup>, Muhammad Shahzad<sup>3</sup>, Chaofeng Ma<sup>4</sup>, Muhammad Asif Raza<sup>1</sup>, Xiaokang Wu<sup>5</sup>, Hui Guo<sup>6</sup>, Peijie Shi<sup>6</sup>, Jiru Xu<sup>7\*</sup>

<sup>1</sup>Department of veterinary and animal sciences, Muhammad Nawaz Sharif University of Agriculture, Multan, Pakistan.

<sup>2</sup>Department of Pharmaceutics, School of Pharmacy, China Pharmaceutical University, Nanjing, China.

<sup>3</sup>Department of Pharmacology, University of Health Sciences, Khyaban-e-Jamia Punjab, Lahore, Pakistan.

<sup>4</sup>Xi'an center for disease control and prevention, China

<sup>5</sup>The second Affiliated Hospital of Xi'an Jiaotong University, 157 Xiwu Street, Xi'an China.

<sup>6</sup>Department of Endocrinology and metabolic diseases, 1st affiliated Hospital Xi'an Jiotong University, China.

<sup>7</sup>Department of Microbiology and Immunology, Key Laboratory of Environment and Genes Related to Diseases of Chinese Ministry of Education, School of Medicine, Xian Jiaotong University, Xi'an, China.

**Correspondence and reprints:** Prof. Dr. Jiru Xu, Department of Microbiology and Immunology, Key Laboratory of Environment and Genes Related to Diseases of Chinese Ministry of Education, School of Medicine, Xian Jiaotong University, Xi'an, China.

Email: [xujiru@mail.xjtu.edu.cn](mailto:xujiru@mail.xjtu.edu.cn)

40  
41

**Table. S1. Serum thyroid hormone and antibodies level in GD patients at the time of sample collection.**

| Patients | Age | T3 (ng/ml) | T4( µg/dl) | FT3(pmol/L) | FT4(pmol/L) | TSH(µIU/ml) | Anti-TPO U/ml | Anti-TG Ab % | TR-Ab U/L |
|----------|-----|------------|------------|-------------|-------------|-------------|---------------|--------------|-----------|
| 1        | 42  | 2.71       | 25.5       | 12.8        | 86.3        | <0.07       | 1445.7        | 43.5         | 21.7      |
| 2        | 35  | 2.75       | 27.3       | 17.69       | 95.2        | <0.07       | >3000         | 64.8         | 35.6      |
| 3        | 37  | 2.85       | 24.13      | 14.88       | 83.6        | 0.1         | 1338.2        | 55.5         | 40.3      |
| 4        | 44  | 2.81       | 31.14      | 13.63       | 92.6        | 0.09        | >3000         | 61.2         | 42.3      |
| 5        | 38  | 2.65       | 28.3       | 15.52       | 74.6        | 0.08        | >3000         | 65.5         | 31.3      |
| 6        | 50  | 2.84       | 28.75      | 13.11       | 60.6        | <0.07       | >3000         | 48.2         | 38.1      |
| 7        | 44  | 2.72       | 24.36      | 12.3        | 64.06       | <0.07       | >3000         | 56.5         | 41.2      |
| 8        | 43  | 2.81       | 26.32      | 14.97       | 67.7        | 0.08        | 1338.7        | 68.9         | 35.5      |
| 9        | 47  | 2.74       | 26.17      | 14.25       | 83.1        | 0.08        | 2435          | 58.6         | 25.8      |
| 10       | 43  | 2.65       | 24.12      | 12.23       | 90.4        | 0.09        | >3000         | 43.5         | 21.9      |
| 11       | 44  | 2.55       | 31.91      | 14.81       | 74.4        | <0.07       | >3000         | 73           | 37.1      |
| 12       | 44  | 2.75       | 25.7       | 12.72       | 75.8        | <0.07       | >3000         | 53.2         | 32.4      |
| 13       | 48  | 2.74       | 26.58      | 13.66       | 70.3        | 0.07        | 2944.1        | 58.4         | 19.8      |
| 14       | 49  | 2.31       | 27.63      | 14.42       | 68.1        | <0.07       | >3000         | 38.2         | 22.9      |
| 15       | 50  | 2.52       | 25.8       | 14.03       | 79.1        | <0.07       | >3000         | 45.7         | 26.8      |
| 16       | 38  | 2.65       | 24.18      | 11.21       | 81.69       | <0.07       | 1848.3        | 43.7         | 37.3      |
| 17       | 45  | 2.55       | 28.98      | 12.17       | 83.1        | 0.07        | >3000         | 61.4         | 27.7      |
| 18       | 35  | 2.58       | 26.4       | 12.5        | 85.1        | <0.07       | 2818.3        | 44.7         | 26.2      |
| 19       | 40  | 2.63       | 27.81      | 14.82       | 84.3        | <0.07       | >3000         | 43.6         | 40.1      |
| 20       | 43  | 2.63       | 25.46      | 16.3        | 82.4        | <0.07       | >3000         | 61.2         | 41.1      |
| 21       | 45  | 2.6        | 27.82      | 14.14       | 64.5        | 0.07        | >3000         | 62.5         | 27.8      |
| 22       | 44  | 2.61       | 26.66      | 12.97       | 69.14       | <0.07       | 1296.5        | 58.6         | 43.4      |
| 23       | 36  | 2.72       | 25.72      | 13.3        | 75.9        | <0.07       | >3000         | 62.5         | 23.7      |
| 24       | 45  | 2.73       | 25.44      | 13.95       | 52.8        | <0.07       | >3000         | 51.8         | 22.6      |
| 25       | 36  | 2.69       | 26.41      | 13.49       | 64.7        | <0.07       | >3000         | 43.6         | 27.9      |
| 26       | 38  | 2.74       | 29.37      | 12.91       | 69.7        | 0.07        | >3000         | 48.2         | 29.2      |
| 27       | 39  | 2.64       | 26.65      | 12.96       | 84.5        | <0.07       | 2796.4        | 67.7         | 28.9      |

42  
43  
44  
45  
46  
47  
48  
49  
50  
51  
52  
53  
54  
55  
56  
57  
58  
59  
60  
61  
62  
63  
64  
65  
66  
67  
68  
69  
70  
71  
72  
73  
74  
75  
76  
77  
78  
79

80 **Table.S2 Serum thyroid hormone and antibodies level in healthy volunteers**

81

| Control | Age | T3 (ng/ml) | T4(μg/dL) | FT3(pmol/L) | FT4(pmol/L) | TSH(μIU/ml) | Anti-TPO U/ml | Anti-TG Ab % | TR-Ab U/L |
|---------|-----|------------|-----------|-------------|-------------|-------------|---------------|--------------|-----------|
| 1       | 35  | 1.09       | 7.11      | 4.14        | 12.1        | 1.96        | Negative      | Negative     | Negative  |
| 2       | 41  | 0.99       | 5.31      | 3.67        | 13.31       | 1.21        | Negative      | Negative     | Negative  |
| 3       | 40  | 1.08       | 4.21      | 3.88        | 14.23       | 1.86        | Negative      | Negative     | Negative  |
| 4       | 36  | 0.91       | 4.32      | 3.63        | 9.19        | 2.12        | Negative      | Negative     | Negative  |
| 5       | 38  | 0.94       | 6.12      | 5.11        | 15.12       | 1.37        | Negative      | Negative     | Negative  |
| 6       | 49  | 1.13       | 5.61      | 4.23        | 11.13       | 1.98        | Negative      | Negative     | Negative  |
| 7       | 50  | 0.91       | 5.82      | 5.15        | 10.16       | 3.13        | Negative      | Negative     | Negative  |
| 8       | 45  | 0.89       | 6.42      | 4.14        | 14.17       | 2.51        | Negative      | Negative     | Negative  |
| 9       | 37  | 0.88       | 4.65      | 3.67        | 13.19       | 3.23        | Negative      | Negative     | Negative  |
| 10      | 43  | 0.92       | 5.71      | 6.18        | 11.41       | 2.45        | Negative      | Negative     | Negative  |
| 11      | 50  | 1.02       | 8.21      | 5.41        | 12.89       | 1.88        | Negative      | Negative     | Negative  |

82
